# Supplementary material
Source: MDPI journal article supplement (https://www.mdpi.com/2813-1053/1/3/10)
Supplement: s1 [file s1]

## Supplemental Figures

### Effect of Substance P on Cellular Migration

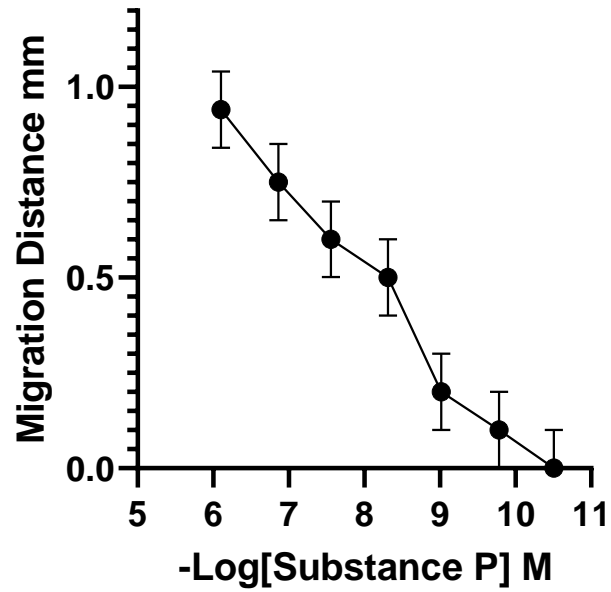

Figure S1. The effect of Substance P on SIRC cells migration. Error bars represent the s.e.m from three determinations.

### Effect of SP (1nM) Vs Insulin on Cellular Migration

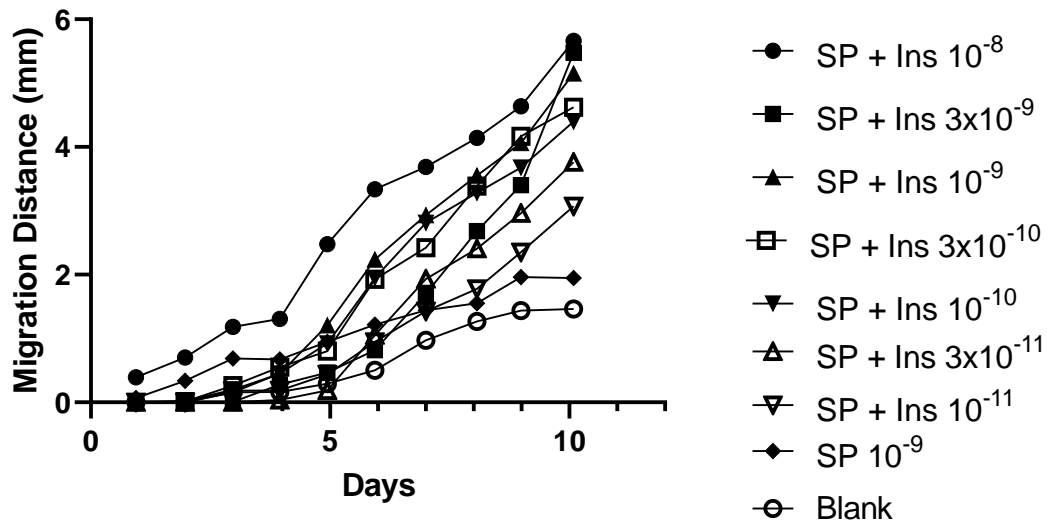

Figure S2. Cellular migration of SIRC cells increases with time after treatment with substance P at 1nM and various concentrations of Insulin. Error bars represent the s.e.m from 3 determinations.

### Effect of SP (1nM) vs IGF-1 on Cellular Migration

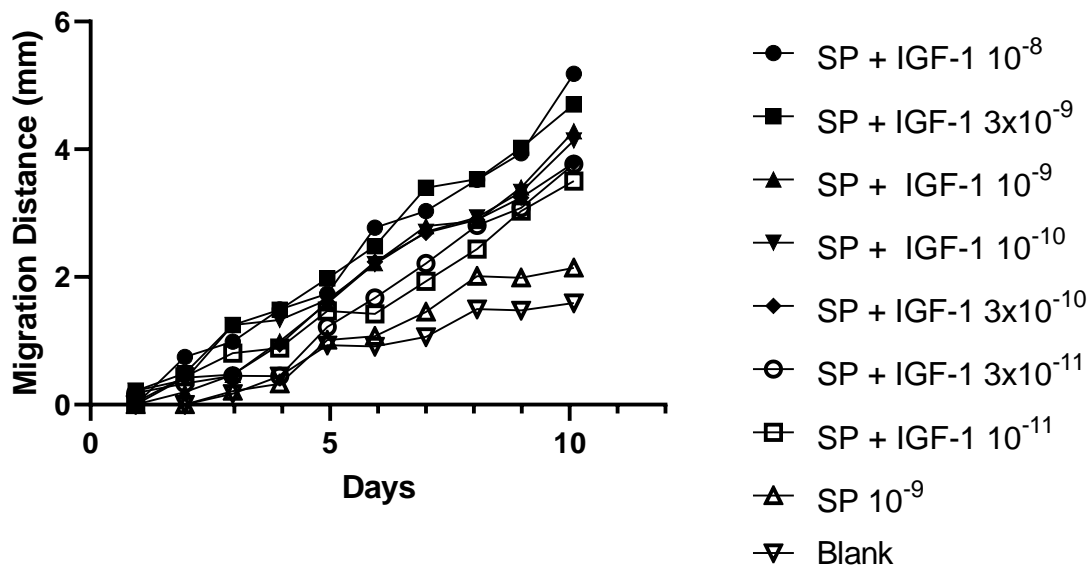

Figure S3. Cellular migration of SIRC cells increases with time after treatment with substance P at 1nM and various concentrations of IGF-1. Error bars represent the s.e.m from 3 determinations.

### Insulin [0.1 nM] vs SP with or without SP Inhibitor CP96,345

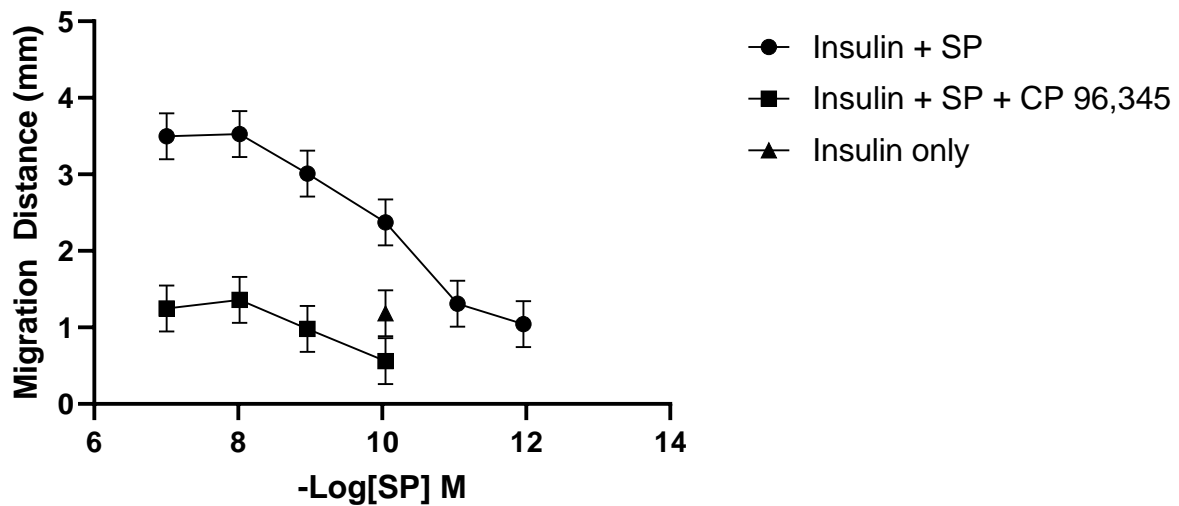

Figure S4. The substance P stimulated migration in the presence of Insulin is inhibited by the NK-1 specific inhibitor CP96,345. Error bars represent the s.e.m from three determinations.

### IGF-1 [0.1 nM] vs SP with or without the SP Inhibitor CP96,345

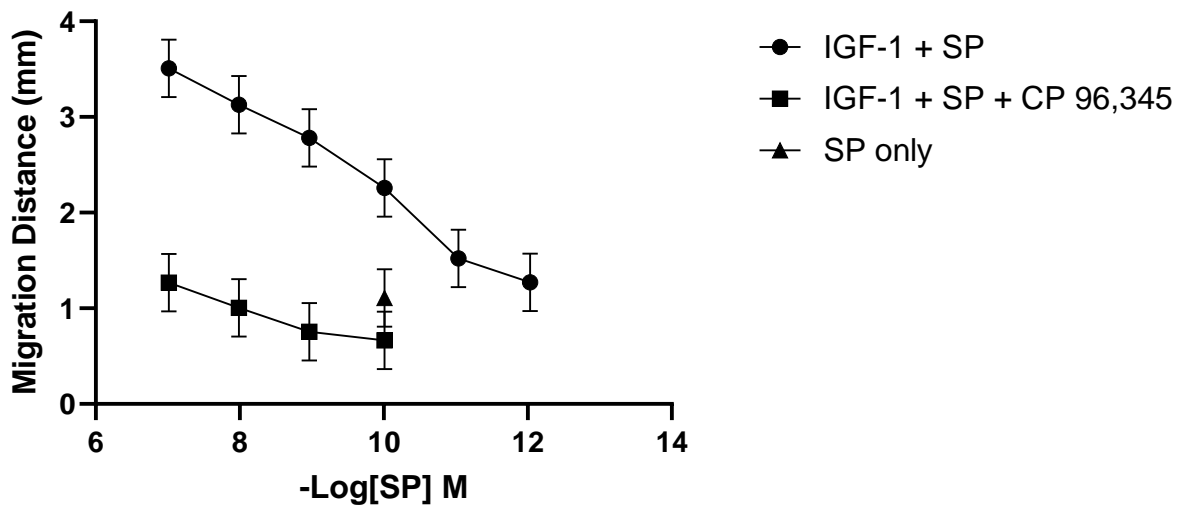

Figure S5. The substance P stimulated migration in the presence of IGF-1 is inhibited by the NK-1 specific inhibitor CP96,345. Error bars represent the s.e.m from three determinations.

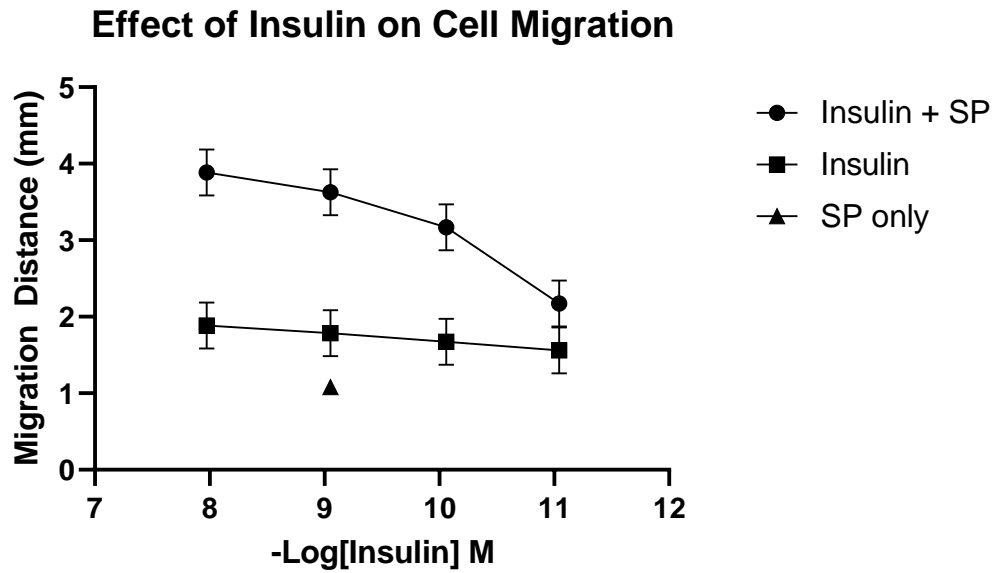

Figure S6. Effect of Substance P (1 nM) with Insulin, on cellular migration of SIRC cells after 7 days. Error bars represent the s.e.m from three determinations.

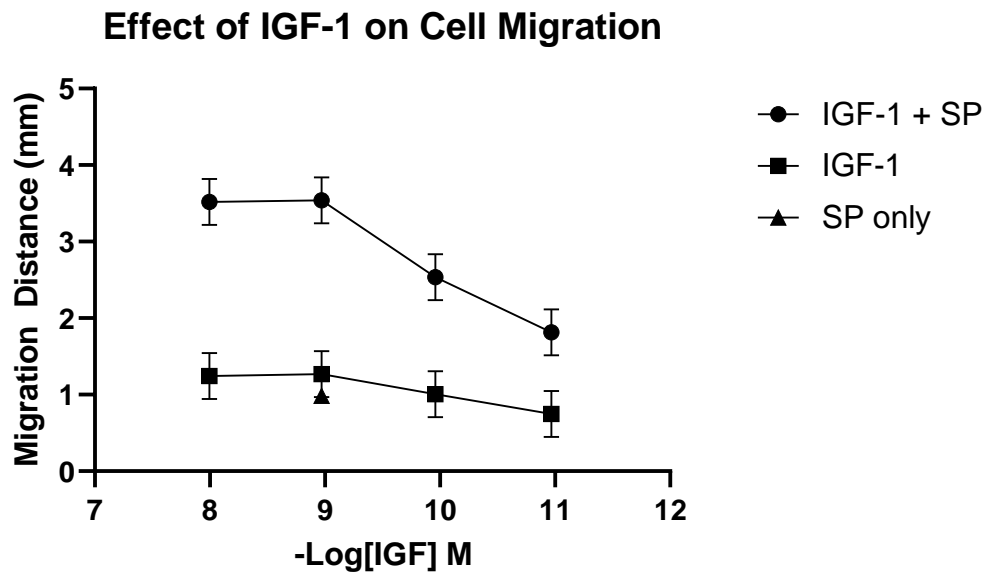

Figure S7. Effect of Substance P (1 nM) with IGF-1, on cellular migration of SIRC cells after 7 days. Error bars represent the s.e.m from three determinations.

### Effect of CP96,345 on the Insulin

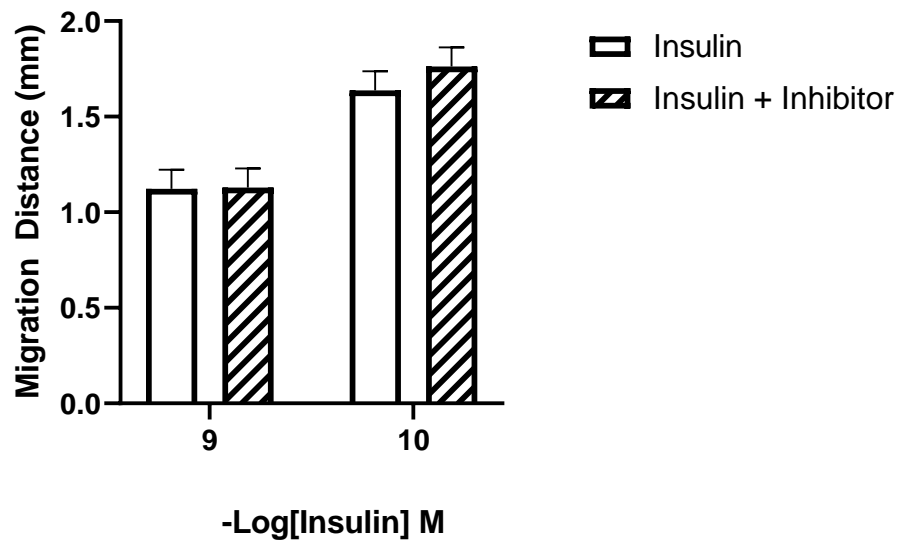

Figure S8. Effect of insulin on cellular migration of SIRC cells after 7 days, with and without the substance P receptor specific inhibitor CP96,345. Error bars represent the s.e.m from three determinations.

### Effect of CP96,345 on the IGF-1

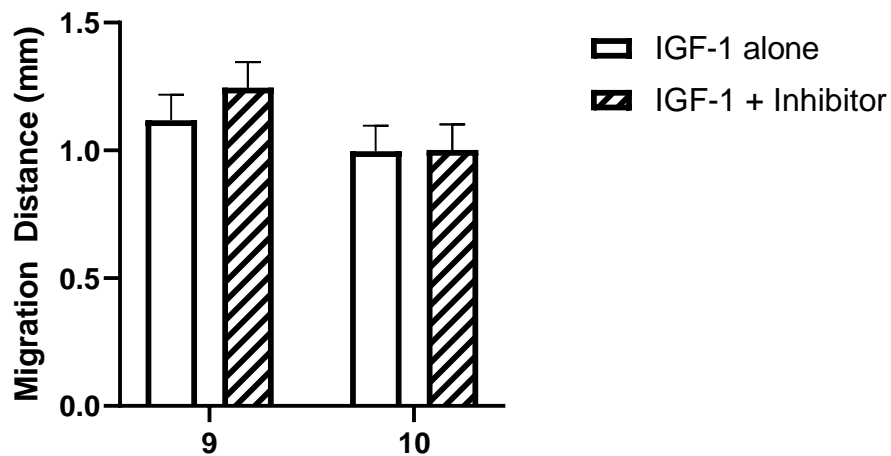

Figure S9. The effect of IGF-1 on SIRC cells transformed cell migration after 7 days, with and without the substance P receptor specific inhibitor CP96,345. Error bars represent the s.e.m from three determinations.
